# Supplementary material for: Signal Peptide Hydrophobicity Modulates Interaction with the Twin-Arginine Translocase
Source: PubMed Central journal article supplement (PMC5539426; doi:10.1128/mbio.00909-17), 2017-08-01

A

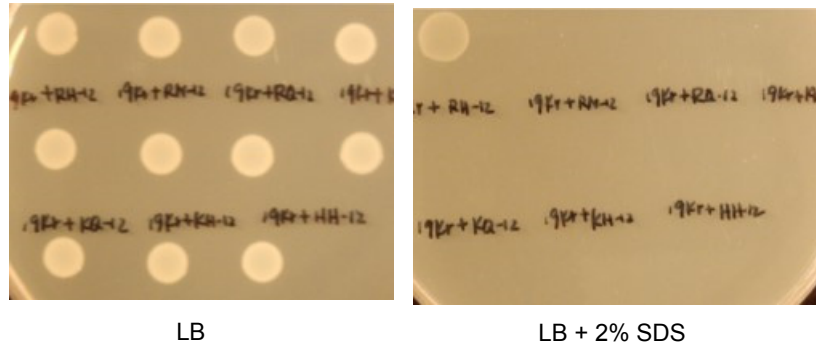

|                         |                     |                    |                    |
|-------------------------|---------------------|--------------------|--------------------|
| <i>tat</i> <sup>+</sup> | $\Delta$ <i>tat</i> | R6D<br>S12L        | R6E<br>S12L        |
| R6H<br>S12L             | R6N<br>S12L         | R6Q<br>S12L        | R5K<br>R6K<br>S12L |
| R5K<br>R6Q<br>S12L      | R5K<br>R6H<br>S12L  | R5H<br>R6H<br>S12L |                    |

B

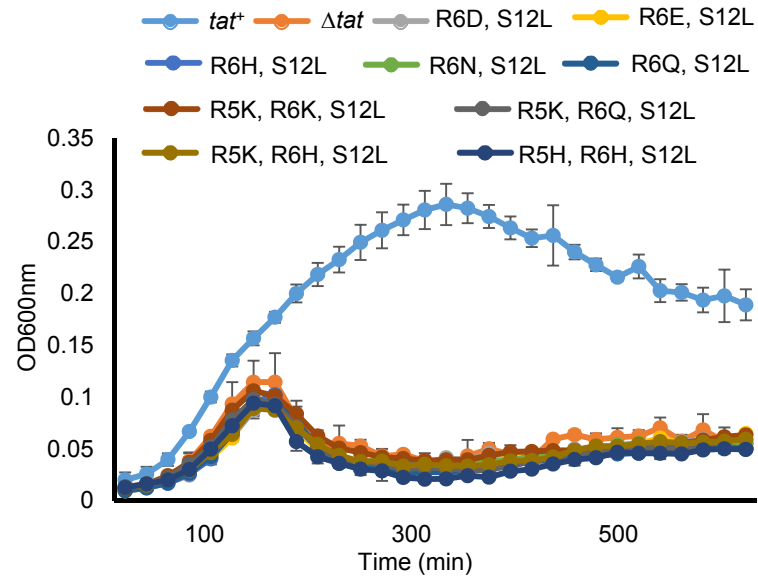

Supplement: mbo004173403sf2.pdf [file mbo004173403sf2.pdf]
