# Supplementary material for: Signal Peptide Hydrophobicity Modulates Interaction with the Twin-Arginine Translocase
Source: PubMed Central journal article supplement (PMC5539426; doi:10.1128/mbio.00909-17), 2017-08-01
Supplement: mbo004173403sf3.pdf [file mbo004173403sf3.pdf]

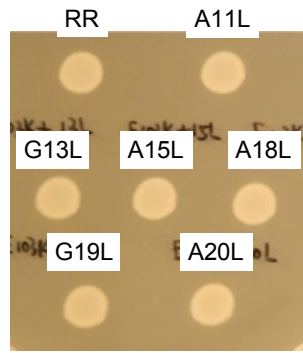

LB

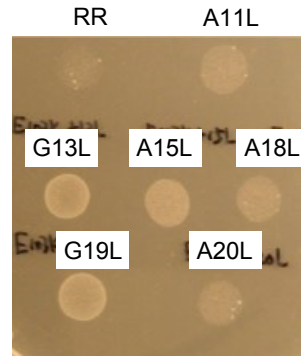

LB + 2% SDS
