# Supplementary material for: Signal Peptide Hydrophobicity Modulates Interaction with the Twin-Arginine Translocase
Source: PubMed Central journal article supplement (PMC5539426; doi:10.1128/mbio.00909-17), 2017-08-01

Input

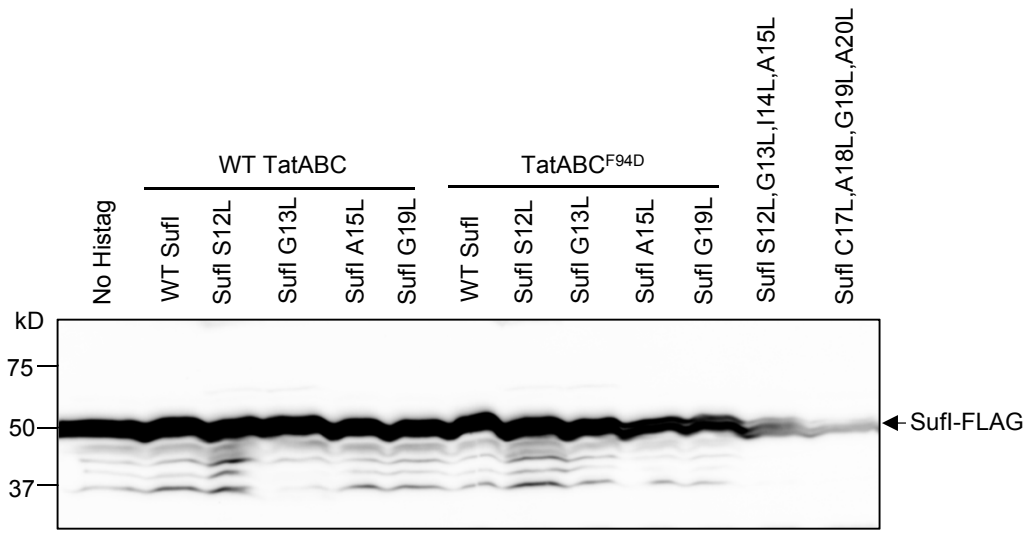

Supplement: mbo004173403sf6.pdf [file mbo004173403sf6.pdf]
